# Supplementary material for: Cdc6 contributes to abrogating the G1 checkpoint under hypoxic conditions in HPV E7 expressing cells
Source: PubMed Central journal article supplement (PMC5462782; doi:10.1038/s41598-017-03060-w), 2017-06-07

# Supplementary Information

## **Cdc6 contributes to abrogating the G1 checkpoint under hypoxic conditions in HPV E7 expressing cells**

Hanxiang Chen<sup>1</sup>, Qishu Zhang<sup>2</sup>, Lijun Qiao<sup>2</sup>, Xueli Fan<sup>3,4</sup>, Weifang Zhang<sup>1</sup>, Weiming Zhao<sup>1,\*</sup>  
and Jason J. Chen<sup>2,\*</sup>

<sup>1</sup>Department of Pathogenic Biology and Key Laboratory of Infection and Immunity of Shandong Province, Shandong University School of Basic Medical Sciences, Jinan, Shandong 250012, China

<sup>2</sup>The Cancer Research Center, Shandong University School of Medicine, Jinan, Shandong 250012, China.

<sup>3</sup>Department of Medicine, University of Massachusetts Medical School, Worcester, MA 01532, USA.

<sup>4</sup>Department of Dermatology, Xijing Hospital, Fourth Military Medical University, Xian, Shanxi 710032, China.

\*Corresponding authors: Jason J. Chen, Email: [jxchen@sdu.edu.cn](mailto:jxchen@sdu.edu.cn). Weiming Zhao, Email: [zhaowm@sdu.edu.cn](mailto:zhaowm@sdu.edu.cn).

**Supplementary Table 1:****Proteins up-regulated in RPE1 E7 expressing cells**

| <b>Accession</b> | <b>Score</b> | <b>Fold</b> | <b>UniProtKB ID</b> |
|------------------|--------------|-------------|---------------------|
| P46821 MAP1B     | 155.47       | ∞           | P46821              |
| P42167 LAP2B     | 77.73        | ∞           | P42167              |
| Q15102 PA1B3     | 66.12        | ∞           | Q15102              |
| B4DJ66 B4DJ66    | 166.13       | 186.96      | B4DJ66              |
| P61970 NUTF2     | 21.53        | 151.69      | P61970              |
| B4DH52 B4DH52    | 47.06        | 73.21       | B4DH52              |
| Q00059 TFAM      | 24.95        | 56.1        | Q00059              |
| P50552 VASP      | 61.73        | 23.63       | P50552              |
| Q03405-2 UPAR    | 46.17        | 18.81       | Q03405-2            |
| F5GYX3 F5GYX3    | 48.16        | 13.61       | F5GYX3              |
| F5H6I5 F5H6I5    | 120.06       | 11.44       | F5H6I5              |
| P46977 STT3A     | 43.8         | 11.4        | P46977              |
| Q96C19 EFHD2     | 77.71        | 10.25       | Q96C19              |
| Q53F19-2 CQ085   | 26.03        | 8.6         | Q53F19-2            |
| Q9Y696 CLIC4     | 146.58       | 8.47        | Q9Y696              |
| Q92973-2 TNPO1   | 45.47        | 7.65        | Q92973-2            |
| O96019-2 ACL6A   | 41.29        | 7.23        | O96019-2            |
| Q9H3M7 TXNIP     | 39.05        | 6.69        | Q9H3M7              |
| O00186 STXB3     | 42.88        | 6.56        | O00186              |
| B7Z5D9 B7Z5D9    | 50.62        | 5.68        | B7Z5D9              |
| O15372 EIF3H     | 143.42       | 4.97        | O15372              |
| P50213-2 IDH3A   | 46           | 4.91        | P50213-2            |
| F5GXL2 F5GXL2    | 72           | 4.68        | F5GXL2              |
| Q8TF72 SHRM3     | 59.8         | 4.66        | Q8TF72              |
| C9JYY7 C9JYY7    | 32.33        | 4.48        | C9JYY7              |
| Q8WW12-2 PCNP    | 36.62        | 4.47        | Q8WW12-2            |
| A6NN80 A6NN80    | 455.74       | 4.37        | A6NN80              |
| B4DHC4 B4DHC4    | 186.28       | 3.96        | B4DHC4              |
| B7Z1R5 B7Z1R5    | 68.6         | 3.86        | B7Z1R5              |
| P07814 SYEP      | 184.38       | 3.75        | P07814              |
| A8MZ62 A8MZ62    | 32.17        | 3.28        | A8MZ62              |
| F5H6X6 F5H6X6    | 563.51       | 3.2         | F5H6X6              |
| Q9Y4D7-2 PLXD1   | 37.34        | 3.15        | Q9Y4D7-2            |
| Q71DI3 H32       | 85.25        | 3.03        | Q71DI3              |
| P16401 H15       | 135.75       | 2.9         | P16401              |
| B3KUP2 B3KUP2    | 108.93       | 2.82        | B3KUP2              |
| P04040 CATA      | 72.61        | 2.79        | P04040              |
| P22102 PUR2      | 103.29       | 2.74        | P22102              |
| P42892-2 ECE1    | 38.96        | 2.72        | P42892-2            |

|                |        |      |          |
|----------------|--------|------|----------|
| P41221 WNT5A   | 14.7   | 2.72 | P41221   |
| B4E1M5 B4E1M5  | 67.34  | 2.64 | B4E1M5   |
| P23381 SYWC    | 57.57  | 2.63 | P23381   |
| O60343-2 TBCD4 | 59.48  | 2.6  | O60343-2 |
| E5RFF9 E5RFF9  | 19.58  | 2.6  | E5RFF9   |
| B7Z576 B7Z576  | 29.49  | 2.59 | B7Z576   |
| E7ET98 E7ET98  | 56.63  | 2.49 | E7ET98   |
| F5GWE6 F5GWE6  | 44.01  | 2.49 | F5GWE6   |
| F5GZ28 F5GZ28  | 41.29  | 2.48 | F5GZ28   |
| P04181 OAT     | 153.35 | 2.47 | P04181   |
| E7EQG2 E7EQG2  | 111.66 | 2.45 | E7EQG2   |
| Q92820 GGH     | 39.85  | 2.45 | Q92820   |
| P00491 PNPH    | 31.44  | 2.44 | P00491   |
| P60842 IF4A1   | 292.06 | 2.38 | P60842   |
| P41091 IF2G    | 168.16 | 2.3  | P41091   |
| B2RDM2 B2RDM2  | 117.68 | 2.29 | B2RDM2   |
| P67936-2 TPM4  | 307.35 | 2.28 | P67936-2 |
| Q5T4L4 Q5T4L4  | 44.69  | 2.28 | Q5T4L4   |
| P07741 APT     | 71.56  | 2.27 | P07741   |
| O14950 ML12B   | 52.37  | 2.25 | O14950   |
| P84243 H33     | 127.5  | 2.13 | P84243   |
| P08473 NEP     | 32.44  | 2.13 | P08473   |
| Q5VTU3 Q5VTU3  | 69.28  | 2.12 | Q5VTU3   |
| A6QRJ1 A6QRJ1  | 32.26  | 2.12 | A6QRJ1   |
| P61201-2 CSN2  | 41.11  | 2.1  | P61201-2 |
| F8WJN3 F8WJN3  | 98.76  | 2.07 | F8WJN3   |
| P15374 UCHL3   | 96.84  | 2.07 | P15374   |
| Q96EK5 KBP     | 45.05  | 2.07 | Q96EK5   |
| Q96JD6 AKCL2   | 46.56  | 2.04 | Q96JD6   |
| F8VXB4 F8VXB4  | 607.74 | 2.01 | F8VXB4   |
| E7EM48 E7EM48  | 323.76 | 2.01 | E7EM48   |
| P08648 ITA5    | 67.96  | 2.01 | P08648   |
| B4DFL2 B4DFL2  | 259.91 | 1.98 | B4DFL2   |
| Q8WXX5 DNJC9   | 42.81  | 1.93 | Q8WXX5   |
| E9PB21 E9PB21  | 24.47  | 1.93 | E9PB21   |
| A6NHK2 A6NHK2  | 13.74  | 1.93 | A6NHK2   |
| P13010 XRCC5   | 109.9  | 1.92 | P13010   |
| F8VTL3 F8VTL3  | 474.85 | 1.91 | F8VTL3   |
| B3SXQ8 B3SXQ8  | 296.74 | 1.9  | B3SXQ8   |
| F5H335 F5H335  | 193.35 | 1.9  | F5H335   |
| P11766 ADHX    | 188.46 | 1.9  | P11766   |
| Q13177 PAK2    | 104.25 | 1.89 | Q13177   |
| Q13526 PIN1    | 82.5   | 1.88 | Q13526   |
| C9J5P2 C9J5P2  | 248.23 | 1.87 | C9J5P2   |

|                |        |      |          |
|----------------|--------|------|----------|
| Q5T9B7 Q5T9B7  | 52.71  | 1.87 | Q5T9B7   |
| B7Z4B8 B7Z4B8  | 71.63  | 1.84 | B7Z4B8   |
| F6RPD3 F6RPD3  | 41.87  | 1.84 | F6RPD3   |
| F8WE04 F8WE04  | 278.21 | 1.83 | F8WE04   |
| Q9Y281 COF2    | 146.01 | 1.83 | Q9Y281   |
| Q63ZY3-2 KANK2 | 95.87  | 1.82 | Q63ZY3-2 |
| F5CTF3 F5CTF3  | 25.16  | 1.82 | F5CTF3   |
| P23284 PPIB    | 207.26 | 1.81 | P23284   |
| Q4TTY5 Q4TTY5  | 54.37  | 1.81 | Q4TTY5   |
| O60271-7 JIP4  | 62.16  | 1.79 | O60271-7 |
| Q99741 CDC6    | 38.13  | 1.79 | Q99741   |
| Q9Y3C4-3 TPRKB | 29.21  | 1.79 | Q9Y3C4-3 |
| B4DY81 B4DY81  | 21.83  | 1.79 | B4DY81   |
| Q15287 RNPS1   | 69.46  | 1.78 | Q15287   |
| P09486 SPARC   | 20.86  | 1.78 | P09486   |
| B7Z7L3 B7Z7L3  | 75.84  | 1.75 | B7Z7L3   |

### Proteins down-regulated in RPE1 E7 expressing cells

| Accession     | Score  | Fold   | UniProtKB ID |
|---------------|--------|--------|--------------|
| P62495 ERF1   | 56.18  | 136.12 | P62495       |
| D9YZV2 D9YZV2 | 187.8  | 110.74 | D9YZV2       |
| P02533 K1C14  | 75.49  | 55.81  | P02533       |
| B5MC82 B5MC82 | 68.39  | 47.6   | B5MC82       |
| E9PQN9 E9PQN9 | 73.66  | 44.5   | E9PQN9       |
| Q9UNX4 WDR3   | 25.74  | 38.28  | Q9UNX4       |
| Q9BPX5 ARP5L  | 67.12  | 25.33  | Q9BPX5       |
| B3KQ95 B3KQ95 | 34.55  | 24.25  | B3KQ95       |
| F8WCG3 F8WCG3 | 67.96  | 20.12  | F8WCG3       |
| F8VY02 F8VY02 | 118.36 | 19.77  | F8VY02       |
| F5H6X2 F5H6X2 | 57.06  | 16.15  | F5H6X2       |
| P35527 K1C9   | 40.88  | 12.99  | P35527       |
| F5H2F4 F5H2F4 | 138.84 | 10.85  | F5H2F4       |
| E9PAV3 E9PAV3 | 135.16 | 10.12  | E9PAV3       |
| Q9H3N1 TMX1   | 49.87  | 9.51   | Q9H3N1       |
| F8W7C6 F8W7C6 | 214.25 | 7.07   | F8W7C6       |
| Q8N995 Q8N995 | 53.99  | 6.26   | Q8N995       |
| E9PS42 E9PS42 | 28.74  | 3.58   | E9PS42       |
| Q92520 FAM3C  | 23.59  | 2.88   | Q92520       |
| O94925-3 GLSK | 50.78  | 2.67   | O94925-3     |
| Q9Y3D6 FIS1   | 43.54  | 2.63   | Q9Y3D6       |
| F5GXL9 F5GXL9 | 72.11  | 2.6    | F5GXL9       |
| F8WAM4 F8WAM4 | 99.29  | 2.57   | F8WAM4       |
| P17931 LEG3   | 39.16  | 2.57   | P17931       |

|                |        |      |          |
|----------------|--------|------|----------|
| P31689 DNJA1   | 70.02  | 2.54 | P31689   |
| F5H2A4 F5H2A4  | 18.29  | 2.5  | F5H2A4   |
| P12270 TPR     | 155.25 | 2.49 | P12270   |
| Q16222-3 UAP1  | 147.35 | 2.46 | Q16222-3 |
| P00750-3 TPA   | 18.61  | 2.43 | P00750-3 |
| P13645 K1C10   | 304.83 | 2.36 | P13645   |
| P20618 PSB1    | 80.7   | 2.31 | P20618   |
| P00441 SODC    | 48.18  | 2.31 | P00441   |
| F5GZI1 F5GZI1  | 61.87  | 2.3  | F5GZI1   |
| Q9Y5Z4-2 HEBP2 | 26.19  | 2.3  | Q9Y5Z4-2 |
| Q13242 SRSF9   | 53.97  | 2.28 | Q13242   |
| P04264 K2C1    | 744.72 | 2.25 | P04264   |
| E9PP17 E9PP17  | 22.08  | 2.23 | E9PP17   |
| B4E2W0 B4E2W0  | 25.51  | 2.2  | B4E2W0   |
| Q86VZ5 SMS1    | 16.94  | 2.2  | Q86VZ5   |
| B2RCS5 B2RCS5  | 92.91  | 2.17 | B2RCS5   |
| P53675-2 CLH2  | 332.88 | 2.12 | P53675-2 |
| C9JP00 C9JP00  | 38.92  | 2.12 | C9JP00   |
| A8MVZ9 A8MVZ9  | 118.95 | 2.1  | A8MVZ9   |
| P14868 SYDC    | 266.02 | 2.02 | P14868   |
| B4DHY1 B4DHY1  | 127.31 | 2.02 | B4DHY1   |
| P38646 GRP75   | 98.01  | 2.02 | P38646   |
| Q9Y678 COPG    | 76.32  | 1.99 | Q9Y678   |
| Q06210-2 GFPT1 | 57.74  | 1.96 | Q06210-2 |
| B4E040 B4E040  | 34.66  | 1.96 | B4E040   |
| F5H740 F5H740  | 117.2  | 1.95 | F5H740   |
| A8MSH7 A8MSH7  | 70.67  | 1.94 | A8MSH7   |
| E7ERJ4 E7ERJ4  | 167.68 | 1.92 | E7ERJ4   |
| P57103-2 NAC3  | 34.79  | 1.92 | P57103-2 |
| D6RER5 D6RER5  | 64.6   | 1.91 | D6RER5   |
| B4DXJ9 B4DXJ9  | 187.91 | 1.9  | B4DXJ9   |
| C9JYJ0 C9JYJ0  | 42.55  | 1.9  | C9JYJ0   |
| D6R9W4 D6R9W4  | 172.8  | 1.88 | D6R9W4   |
| P40222 TXLNA   | 56.84  | 1.85 | P40222   |
| E9PMP7 E9PMP7  | 321.76 | 1.84 | E9PMP7   |
| Q99536 VAT1    | 92.22  | 1.83 | Q99536   |
| P43034 LIS1    | 66.88  | 1.83 | P43034   |
| E7EWH4 E7EWH4  | 86.3   | 1.82 | E7EWH4   |
| P62244 RS15A   | 78.1   | 1.82 | P62244   |
| Q12931 TRAP1   | 43.18  | 1.82 | Q12931   |
| B4DNU6 B4DNU6  | 35.34  | 1.82 | B4DNU6   |
| P49913 CAMP    | 13.95  | 1.82 | P49913   |
| Q01813 K6PP    | 438.92 | 1.81 | Q01813   |
| Q08499-6 PDE4D | 27.07  | 1.81 | Q08499-6 |

|                |        |      |          |
|----------------|--------|------|----------|
| P62805 H4      | 304.52 | 1.8  | P62805   |
| B5ME19 B5ME19  | 182.11 | 1.8  | B5ME19   |
| O15144 ARPC2   | 94.01  | 1.8  | O15144   |
| O15042-3 SR140 | 81.86  | 1.8  | O15042-3 |
| E9PJF7 E9PJF7  | 92.89  | 1.79 | E9PJF7   |
| P17858 K6PL    | 136.69 | 1.78 | P17858   |
| P13726 TF      | 131.49 | 1.78 | P13726   |
| F2Z388 F2Z388  | 94.93  | 1.78 | F2Z388   |
| B4DEG8 B4DEG8  | 66.15  | 1.78 | B4DEG8   |
| F5H307 F5H307  | 25.56  | 1.78 | F5H307   |
| P61221 ABCE1   | 129.65 | 1.77 | P61221   |
| O14828-2 SCAM3 | 23.06  | 1.76 | O14828-2 |
| P07384 CAN1    | 83.18  | 1.75 | P07384   |
| D6QS48 D6QS48  | 79.45  | 1.75 | D6QS48   |
| Q96FQ6 S10AG   | 51.83  | 1.75 | Q96FQ6   |

**Supplementary Figure 1:**

Presentation of original immunoblots. The cropped parts of immunoblots were indicated with boxes.

Figure 2a

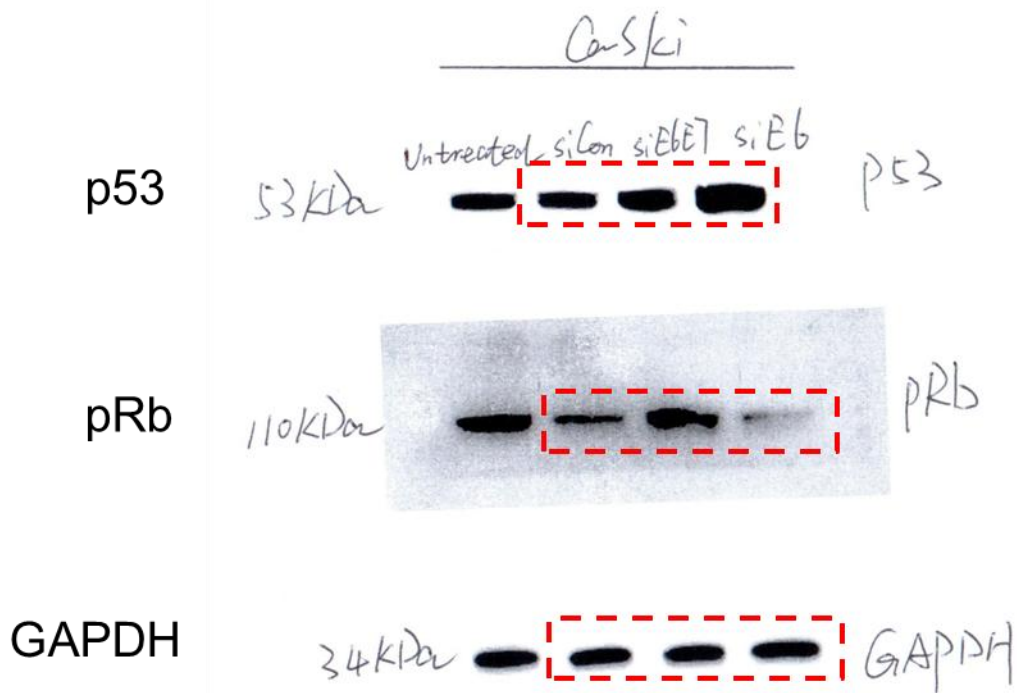

## Supplementary Figure 2:

Presentation of original immunoblots.

Figure 3a

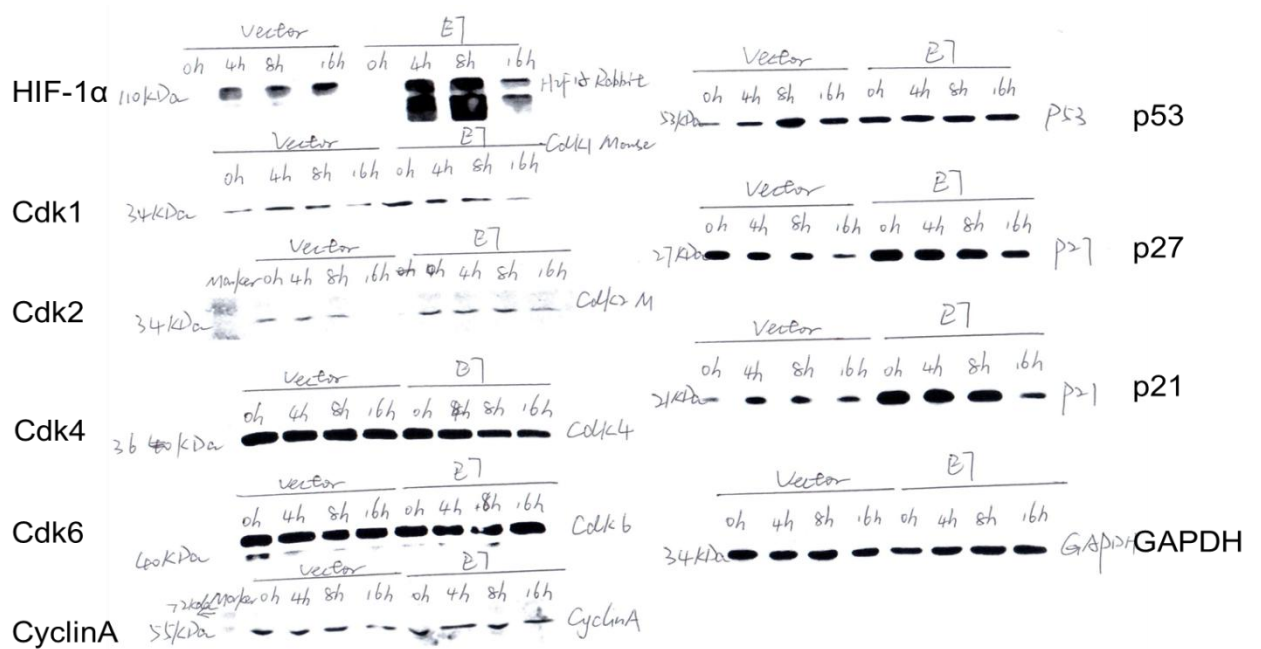

Figure 3b

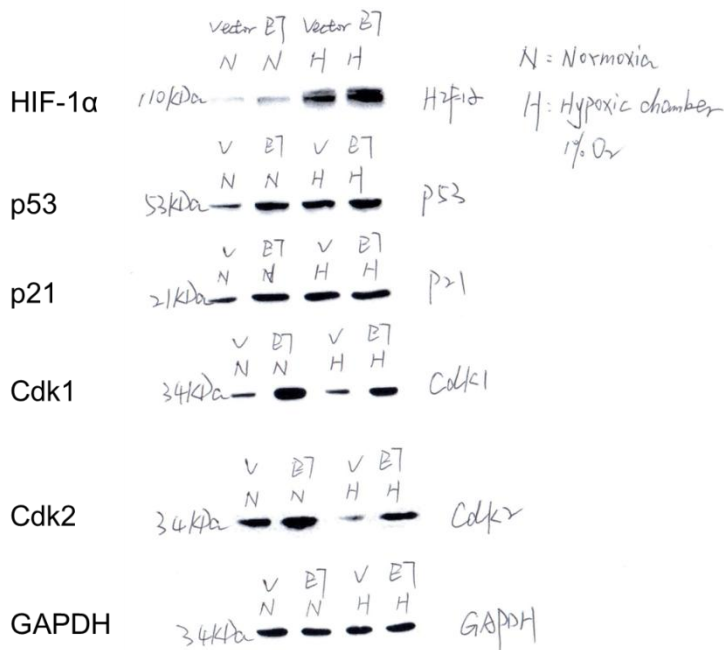



### Supplementary Figure 3:

Presentation of original immunoblots.

Figure 4c

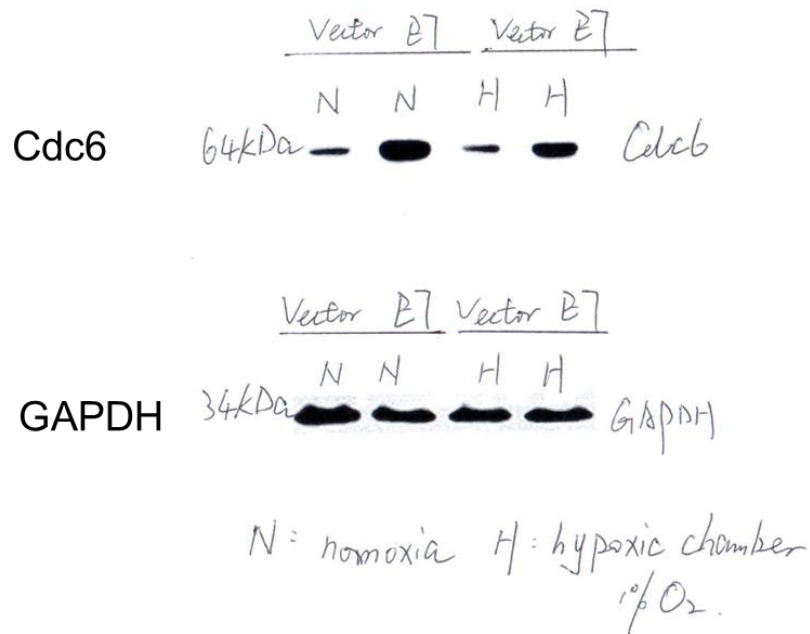

Figure 5a

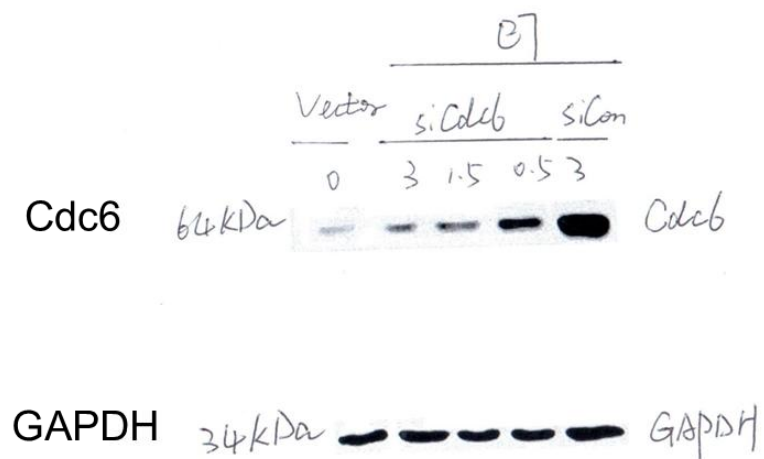

Supplement: 41598_2017_3060_MOESM1_ESM.pdf [file 41598_2017_3060_MOESM1_ESM.pdf]
